# Supplementary material for: A structural basis for prion strain diversity
Source: PubMed Central journal article supplement (PMC10154210; doi:10.1038/s41589-022-01229-7), 2023-01-16
Supplement: 41589_2022_1229_MOESM1_ESM.pdf [file 41589_2022_1229_MOESM1_ESM.pdf]

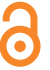

---

# A structural basis for prion strain diversity

---

In the format provided by the  
authors and unedited

---

## **Table of Contents:**

Supplementary Table 1. Determination of prion infectivity titre in cell culture

Supplementary Table 2. Cryo-EM data collection, refinement and validation statistics

Supplementary Figure 1. 2D classification of ME7 prion fibrils

Supplementary Figure 2. Quality of the ME7 map and model

Supplementary references

**Supplementary Table 1. Determination of prion infectivity titre in cell culture**

| Dilution           | Positive Wells (w/w <sub>0</sub> ) |               |                    | Percentage Positivity |               |                    |
|--------------------|------------------------------------|---------------|--------------------|-----------------------|---------------|--------------------|
|                    | RML BH I6200*                      | ME7 BH I21487 | Purified ME7 (1X)† | RML BH I6200*         | ME7 BH I21487 | Purified ME7 (1X)† |
| 1.10 <sup>-4</sup> | 24 / 24                            | 24 / 24       | 24 / 24            | 100.0%                | 100.0%        | 100.0%             |
| 3.10 <sup>-5</sup> | 24 / 24                            | 24 / 24       | 24 / 24            | 100.0%                | 100.0%        | 100.0%             |
| 1.10 <sup>-5</sup> | 20 / 24                            | 24 / 24       | 15 / 24            | 83.3%                 | 100.0%        | 62.5%              |
| 3.10 <sup>-6</sup> | 5 / 24                             | 16 / 24       | 5 / 24             | 20.8%                 | 66.7%         | 20.8%              |
| 1.10 <sup>-6</sup> | 2 / 24                             | 9 / 24        | 1 / 24             | 8.3%                  | 37.5%         | 4.2%               |
| 3.10 <sup>-7</sup> | 0 / 24                             | 2 / 24        | 0 / 24             | 0.0%                  | 8.3%          | 0.0%               |
| 1.10 <sup>-7</sup> | 0 / 24                             | 1 / 24        | 0 / 24             | 0.0%                  | 4.2%          | 0.0%               |
| NI                 | 0 / 24                             | 0 / 24        | 0 / 25             | 0.0%                  | 0.0%          | 0.0%               |

|                                  |            |            |            |
|----------------------------------|------------|------------|------------|
| <b>log TCIU ml<sup>-1</sup>‡</b> | <b>5.8</b> | <b>6.1</b> | <b>5.5</b> |
|----------------------------------|------------|------------|------------|

**Measurement of total protein and PrP content:**

|                                           |             |             |               |
|-------------------------------------------|-------------|-------------|---------------|
| <b>Total protein (mg ml<sup>-1</sup>)</b> | <b>10.0</b> | <b>10.0</b> | <b>0.0027</b> |
| <b>PrP content (µg ml<sup>-1</sup>)</b>   | <b>5.4</b>  | <b>11.0</b> | <b>2.7</b>    |

**Calculation of specific infectivity:**

|                                         |            |            |            |
|-----------------------------------------|------------|------------|------------|
| <b>log TCIU mg<sup>-1</sup> protein</b> | <b>4.8</b> | <b>5.1</b> | <b>8.1</b> |
| <b>log TCIU mg<sup>-1</sup> PrP</b>     | <b>8.1</b> | <b>8.1</b> | <b>8.1</b> |

(w/w<sub>0</sub>), the number of prion infected wells (w) versus the total number of inoculated wells (w<sub>0</sub>); BH, brain homogenate; TCIU, tissue culture infectious units; NI, non-prion inoculated

\* Prion titre of 10<sup>7.3±0.5</sup> (mean + s.d., n=6) intracerebral LD<sub>50</sub> units/ml in Tg20 mice<sup>1</sup>

† Purified material was resuspended to the same volume as the 10% (w/v) BH from which it was derived

‡ TCIU calculated according to the Poisson distribution<sup>2</sup>

## Supplementary Table 2. Cryo-EM data collection, refinement and validation statistics

---

|                                                     |                                  |
|-----------------------------------------------------|----------------------------------|
|                                                     | ME7<br>(EMD-15043)<br>(PDB 8A00) |
| <b>Data collection and processing</b>               |                                  |
| Magnification                                       | 105,000 x                        |
| Voltage (kV)                                        | 300                              |
| Electron exposure (e <sup>-</sup> /Å <sup>2</sup> ) | 49.4                             |
| Defocus range (μm)                                  | from -2.4 to -0.9                |
| Pixel size (Å)                                      | 0.828                            |
| Symmetry imposed                                    | C1                               |
| Initial particle images (no.)                       | 223,065                          |
| Final particle images (no.)                         | 40,239                           |
| Map resolution (Å)                                  | 2.6                              |
| FSC threshold                                       | 0.143                            |
| Map resolution range (Å)                            | 2.6-3                            |
| <b>Refinement</b>                                   |                                  |
| Initial model used (PDB code)                       | 7QIG                             |
| Model resolution (Å)                                | 2.6                              |
| FSC threshold                                       | 0.143                            |
| Model resolution range (Å)                          | 121.7 - 2.6                      |
| Map sharpening <i>B</i> factor (Å <sup>2</sup> )    | -26.75                           |
| <b>Model composition</b>                            |                                  |
| Non-hydrogen atoms                                  | 6456                             |
| Protein residues                                    | 408                              |
| Ligands                                             | none                             |
| <b><i>B</i> factors (Å<sup>2</sup>)</b>             |                                  |
| Protein                                             | 24.18-67.46                      |
| <b>r.m.s. deviations</b>                            |                                  |
| Bond lengths (Å)                                    | 0.002                            |
| Bond angles (°)                                     | 0.580                            |
| <b>Validation</b>                                   |                                  |
| MolProbity score                                    | 1.49                             |
| Clashscore                                          | 2.79                             |
| Poor rotamers (%)                                   | 0                                |
| <b>Ramachandran plot</b>                            |                                  |
| Favored (%)                                         | 93.53                            |
| Allowed (%)                                         | 6.47                             |
| Disallowed (%)                                      | 0                                |

---

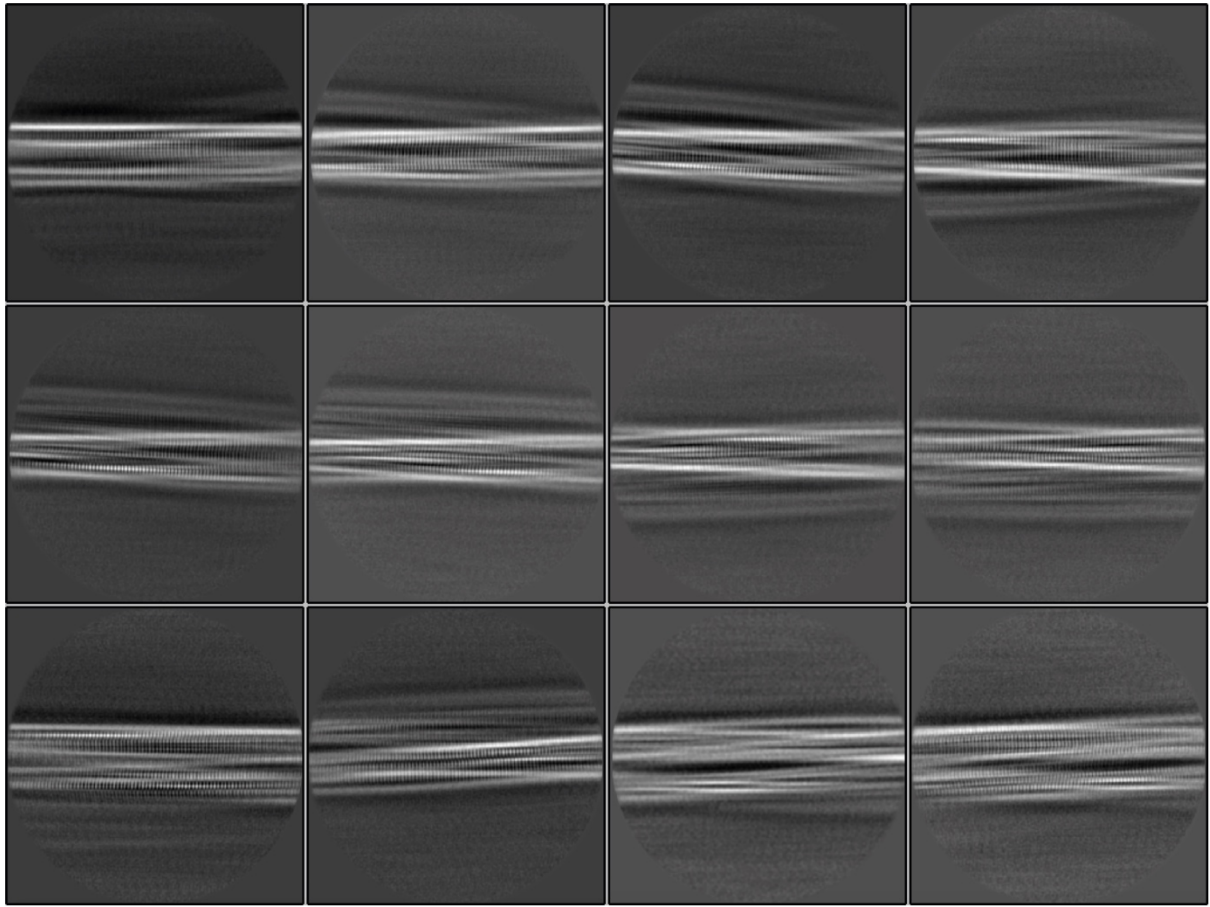

**Supplementary Figure 1. 2D classification of ME7 prion fibrils.** Gallery of representative 2D classes (box size: 397.5 x 397.5 Å).

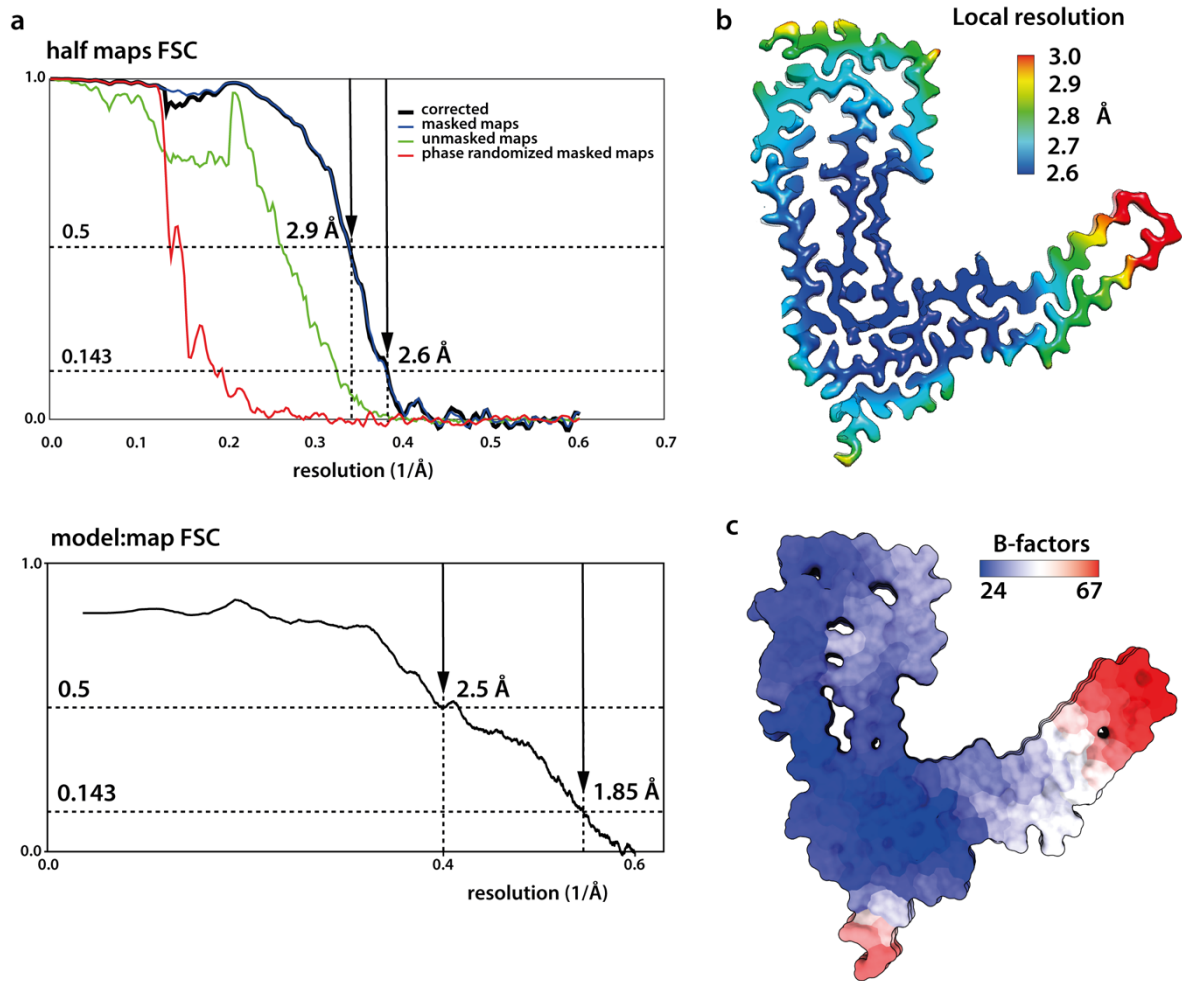

**Supplementary Figure 2. Quality of the ME7 map and model.** **a** Top, Fourier Shell Correlation (FSC) plots for independent half-reconstructions, determined in Relion 4.0-beta. The final plot (black line) is corrected for overfitting with high-resolution noise substitution. Bottom, FSC plot for the model:map fit. **b** Local resolution of the protein density calculated with Relion 4.0-beta LocRes. **c** Atomic B-factor values colour-coded on the solvent-excluded model surface.

## Supplementary references

- 1 Wenborn, A. et al. A novel and rapid method for obtaining high titre intact prion strains from mammalian brain. *Sci Rep* **5**, 10062 (2015).
- 2 Edgeworth, J. A., Jackson, G. S., Clarke, A. R., Weissmann, C., & Collinge, J. Highly sensitive, quantitative cell-based assay for prions adsorbed to solid surfaces. *Proc Natl Acad Sci USA* **106**, 3479-3483 (2009).
