# Supplementary material for: A structural basis for prion strain diversity
Source: PubMed Central journal article supplement (PMC10154210; doi:10.1038/s41589-022-01229-7), 2023-01-16

## Source Data for Extended Data Fig. 1

### A structural basis for prion strain diversity

Szymon W. Manka, Adam Wenborn, Jemma Betts, Susan Joiner, Helen R. Saibil, John Collinge and Jonathan D.F. Wadsworth

#### Source data

Images of original silver-stained SDS-PAGE gel and western blot autoradiography film (antibody ICSM 35). Boxed lanes appear in Extended Data Fig. 1.

#### Silver-stained SDS-PAGE gel

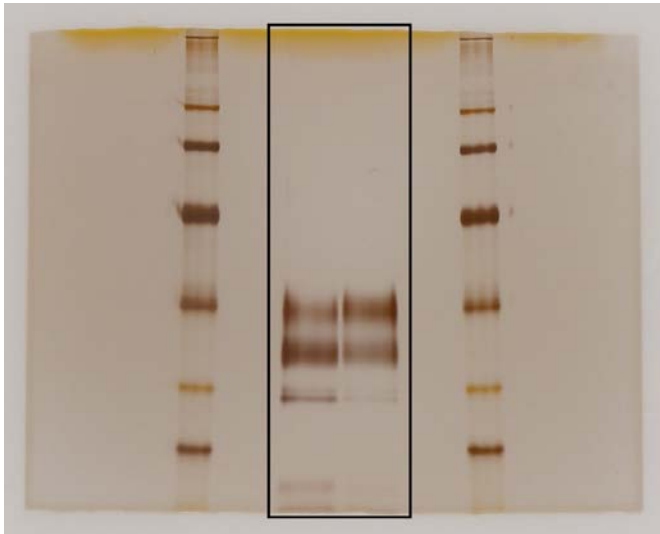

#### Western blot autoradiography film

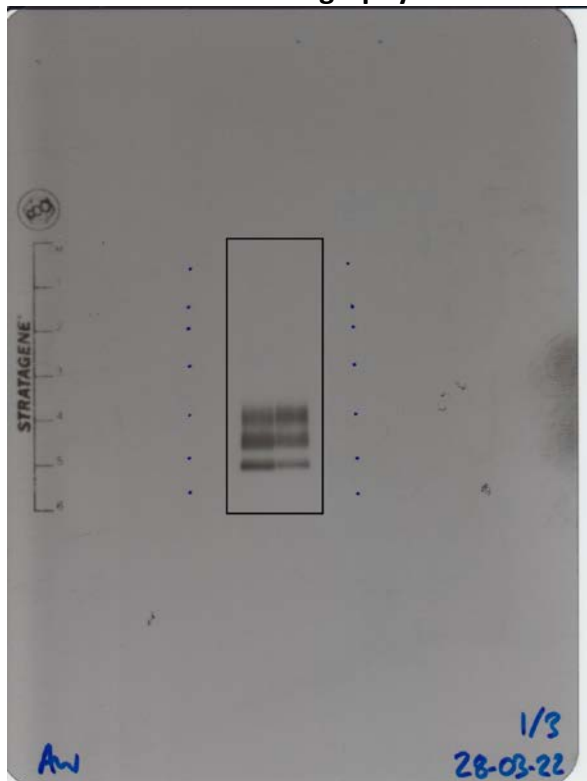

Supplement: 41589_2022_1229_MOESM3_ESM.pdf [file 41589_2022_1229_MOESM3_ESM.pdf]
